# Supplementary material for: The Indian Ocean SST Link to Solar Induced Chlorophyll Fluorescence Over India During Early Summer Monsoon
Source: Research Square preprint supplement (doi:10.21203/rs.3.rs-1133874/v1), 2021-12-06
Supplement: Supplementary file 1 [file 123d86b5cb4f3d719098ef88.docx]

Table S1 Minimum**,** mean and maximum SIF values in each of the agro-climatic zone during summer monsoon

| Agro-climatic zone | Minimum | | Mean | | Maximum | |
| --- | --- | --- | --- | --- | --- | --- |
| Western coastal plains and Ghats (WCPG) | 0.019 | | 0.30 | | 0.41 | |
| Eastern coastal plains and hills (ECPH) | 0.011 | | 0.20 | | 0.47 | |
| Eastern plateau and hills (EPH) | 0.013 | | 0.25 | | 0.45 | |
| Western plateau and hills (WPH) | 0.013 | | 0.18 | | 0.38 | |
| Southern plateau and hills (SPH) | 0.016 | | 0.17 | | 0.41 | |
| Central plateau and hills (CPH) | 0.01 | | 0.17 | | 0.34 | |
| Trans-Gangetic plains (TGP) | 0.01 | | 0.18 | | 0.34 | |
| Upper Gangetic plains (UGP) | 0.049 | | 0.22 | | 0.37 | |
| Middle Gangetic plains (MGP) | 0.014 | | 0.22 | | 0.43 | |
| Lower Gangetic plains (LGP) | 0.022 | | 0.24 | | 0.41 | |
| Gujarat plain and hills (GPH) | 0 | | 0.13 | | 0.35 | |
| Western dry region (WDR) | 0 | | 0.05 | | 0.19 | |
| Western Himalaya region (WHR) | 0 | | 0.08 | | 0.39 | |
| Eastern Himalaya region (EHR) | 0 | | 0.35 | | 0.54 | |
|  | |  | |  | |  | |
